1 Network dimensionality underlies flexible representation of  
2 cognitive information

3  
4 Takuya Ito<sup>1,2,\*</sup>, Michael W. Cole<sup>1</sup>

5  
6 <sup>1</sup>Center for Molecular and Behavioral Neuroscience, Rutgers University, Newark, NJ  
7 07102

8 <sup>2</sup>Behavioral and Neural Sciences PhD Program, Rutgers University, Newark, NJ 07102

9

10 **Contact:**

11 Takuya Ito

12 Center for Molecular and Behavioral Neuroscience, Rutgers University

13 197 University Avenue, Newark, NJ 07102

14 taku.ito1@gmail.edu

15

16 **Abstract**

17 The functional networks in human cortex that most flexibly represent cognitive  
18 information are hubs with widespread connectivity throughout the brain. Going beyond  
19 simple hub measures, we hypothesized that the dimensionality of each network's global  
20 connectivity pattern (its global dimensionality) underlies its ability to produce highly  
21 diverse task activation patterns (its representational flexibility). Supporting our  
22 hypothesis, we report that the global dimensionality estimated during resting state  
23 correlates with the representational flexibility estimated across a variety of cognitive  
24 tasks. Demonstrating the robustness of this relationship, each network's global  
25 connectivity pattern could be used to predict its representational flexibility. Additionally,  
26 we found that the frontoparietal cognitive control network had the highest dimensionality  
27 and flexibility, and that individuals with higher network dimensionality had higher  
28 representational flexibility. Together, these findings suggest that a network's global  
29 dimensionality contributes to its ability to represent diverse cognitive information,  
30 implicating dimensionality as a network mechanism underlying flexible cognitive  
31 representation.

32

## 33 Introduction

34 The human brain's network organization is thought to contribute to its ability to  
35 process information, but the mechanisms linking network organization to information  
36 processing remain unclear. Recent studies have provided links between the brain's  
37 intrinsic network architecture and representations of task-related information (in the form  
38 of task activation patterns)<sup>1,2</sup>, yet the large-scale network properties that underlie the  
39 human brain's ability to flexibly perform a wide range of tasks remains unknown.  
40 Studies at the single and multi-cell level have begun to elucidate the neurophysiological  
41 mechanisms underlying such cognitive flexibility. For example, neurons with mixed  
42 selectivity (i.e., complex tuning) have been shown to flexibly represent a range of stimuli  
43 and task rules<sup>3,4</sup>. However, these studies were often limited to specific brain regions  
44 (e.g., dorsolateral prefrontal cortex), rather than identifying the contribution of large-  
45 scale network organization. Computational studies have provided abstract models for  
46 how various tasks might be executed<sup>5,6</sup>, yet such abstract models leave many questions  
47 with regard to biological mechanisms. Thus, it remains unclear how the human brain's  
48 large-scale network organization might contribute to the flexible implementation of  
49 cognitive tasks.

50 Several studies have provided clues that hub connectivity – a large-scale  
51 network property in which regions have extensive connectivity throughout the brain –  
52 supports high cognitive flexibility<sup>7–11</sup>. For instance, regions within the frontoparietal  
53 cognitive control network (FPN) are hubs<sup>7,9,12</sup> that systematically shift their global  
54 functional connectivity patterns across a variety of tasks<sup>8</sup>. This combination of hub  
55 connectivity that is flexible across tasks led these regions to be termed "flexible hubs".  
56 Critically, however, it has remained unclear whether hub flexibility is only a region-level  
57 or is also a network-level property. Casting doubt on the region-level flexible hub  
58 hypothesis, there is evidence that no cortical regions are "super" hubs in the sense of  
59 individual regions having strong connectivity to all or even most other regions<sup>13</sup>. This  
60 suggests that regions with widespread connectivity would have to pool their connections  
61 to achieve strong hub status. Further, it is unclear why various flexible hubs would be  
62 integrated within the FPN if they have redundant connectivity patterns. We therefore  
63 hypothesized that strong flexible hub properties emerge at the network level, with each  
64 FPN region contributing limited connectivity and flexibility that is integrated within FPN  
65 to collectively produce strong flexible hub properties. More generally, we hypothesized  
66 that network-level dimensionality – the tendency for individual-region connectivity  
67 patterns to be differentiated – would contribute to network-level representational  
68 flexibility (the tendency for a network's activation patterns to be diverse across tasks).

69 To test our hypothesis, we developed a network-level graph theoretical property  
70 – global dimensionality. Global dimensionality characterizes how pattern-separated the  
71 global (i.e., out-of-network) connections of a network are (Fig. 1a). Recent evidence has  
72 suggested robust statistical relationships between resting-state network organization  
73 and task-evoked activations<sup>2,14</sup>, with activity flow – the movement of task-evoked  
74 activations between brain regions – over resting-state connections providing a potential  
75 mechanistic explanation<sup>1</sup>. We sought to build on these findings to investigate whether  
76 the organizational properties of large-scale intrinsic brain networks play a role in the  
77 production of flexible neural representations. We hypothesized that a hub network with  
78 high intrinsic global dimensionality would have a computational advantage in processing

79 task information flexibly, in part by reducing interference between task-relevant  
80 cognitive representations. Providing concrete evidence that links a network's global  
81 dimensionality with flexible task representation would suggest a role for intrinsic network  
82 organization in providing the space of possible computations (cognitive, or otherwise)  
83 performed by the human brain. Given recent evidence suggesting that the FPN acts as  
84 a flexible hub network for adaptive task control<sup>8,10,15,16</sup>, we hypothesized that the  
85 dimensionality of the FPN's global connectivity patterns estimated during resting-state  
86 underlies its ability to flexibly represent a diverse range of tasks.

87 We tested this hypothesis using functional magnetic resonance imaging (fMRI)  
88 data collected as part of the Human Connectome Project (HCP). Evidence linking a  
89 network's global dimensionality estimated during resting-state fMRI and  
90 representational flexibility estimated during task-state fMRI would suggest that such a  
91 network can integrate distributed sets of task-relevant information in an organized  
92 fashion, reducing pattern overlap/interference and producing highly decodable  
93 representations underlying task performance (Fig. 1).  
94

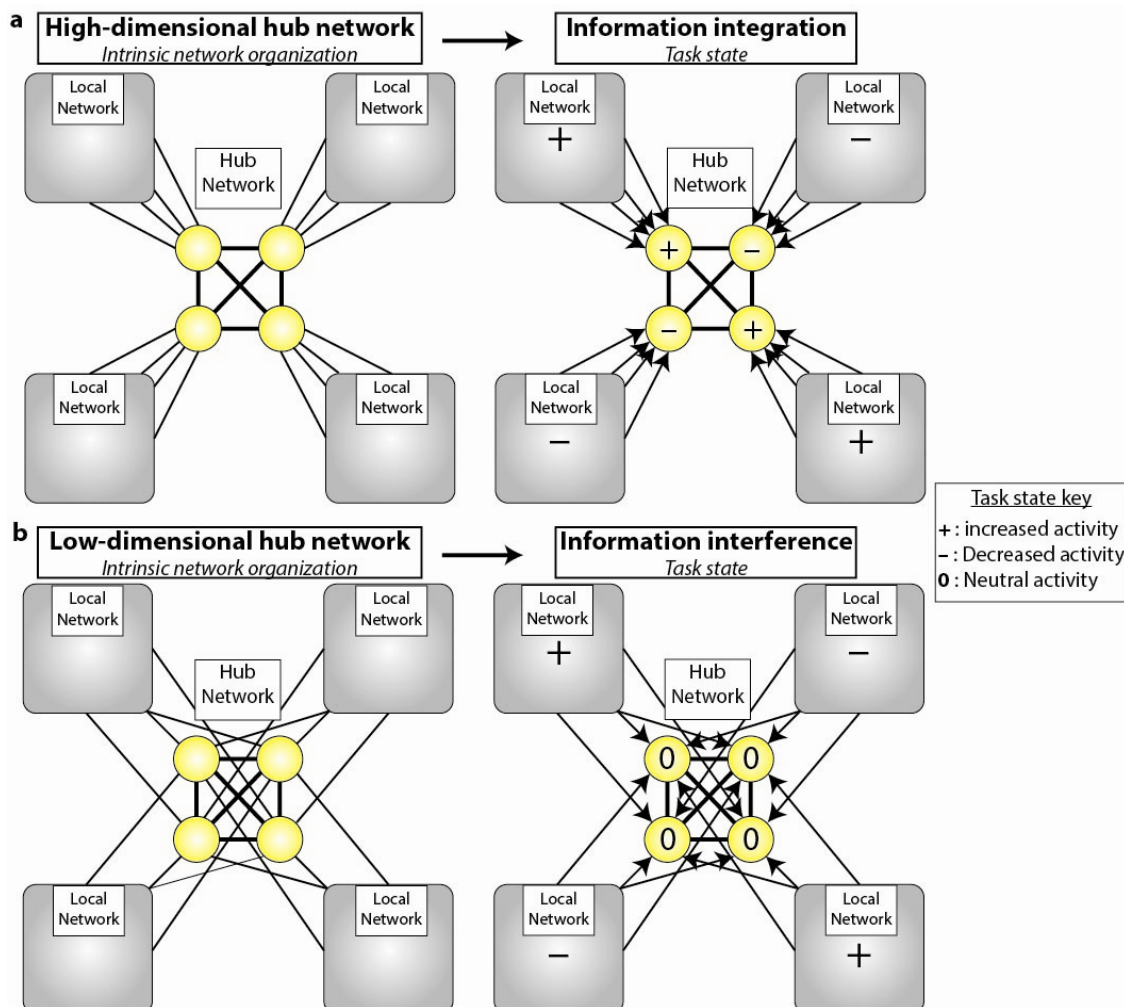

95 **Figure 1. Networks with high-dimensional intrinsic connectivity have a computational**  
96 **advantage over low-dimensional networks. a)** A schematic example of a hub network with  
97 high network dimensionality, due to pattern-separated global connections. Regions within the  
98

99 hub network are yellow. The high-dimensional connectivity organization allows for information  
100 integration from diverse brain systems in a pattern-separated manner. Activity from local  
101 networks mapped to hub network regions produces decodable patterns of activation. **b)** A  
102 schematic example of a hub network with low network dimensionality, due to the lack of pattern-  
103 separated global connections. Every region in the hub network has the same global connectivity  
104 pattern, leading to low network dimensionality. Activity from local networks mapped to hub  
105 network regions produces a net activity of 0 in each region of the hub network. This is due to the  
106 lack of connectivity separation (low-dimensional connections), leading to an interference of  
107 information-bearing signals. Note that the regions in the hub network in panels **a** and **b** have the  
108 same weighted degree centrality.  
109

## 110 **Methods**

111

### 112 *Data collection*

113 Data were collected as part of the Washington University-Minnesota Consortium  
114 of the Human Connectome Project (HCP; Van Essen et al., 2013). The data from the  
115 “100 Unrelated Subjects” ( $n=100$ ) of the greater “500 Subjects” HCP release was used  
116 for empirical analyses. Specific details and procedures of subject recruitment and data  
117 collection can be found in <sup>45</sup>. 100 human participants (54 female) were recruited from  
118 Washington University in St. Louis and the surrounding area. The mean age of the  
119 human participants was 29 years of age (range=24 – 36 years of age). Whole-brain  
120 multiband echo-planar imaging acquisitions were collected on a 32-channel head coil on  
121 a modified 3T Siemens Skyra with TR=720 ms, TE=33.1 ms, flip angle=52°,  
122 Bandwidth=2,290 Hz/Px, in-plane FOV=208x180 mm, 72 slices, 2.0 mm isotropic  
123 voxels, with a multiband acceleration factor of 8. Data for each subject were collected  
124 over the span of two days. On the first day, anatomical scans were collected (including  
125 T1-weighted and T2-weighted images acquired at 0.7 mm isotropic voxels) followed by  
126 two resting-state fMRI scans (each lasting 14.4 minutes), and ending with a task fMRI  
127 component. The second day consisted with first collecting a diffusion imaging scan,  
128 followed by a second set of two resting-state fMRI scans (each lasting 14.4 minutes),  
129 and again ending with a task fMRI session. Each of the seven tasks was collected over  
130 two consecutive fMRI runs. Further details on the resting-state fMRI portion can be  
131 found in <sup>46</sup>, and additional details on the task fMRI components can be found in <sup>47</sup>.

132

### 133 *Task paradigms*

134 The data set was collected as part of the HCP project, which included both  
135 resting-state and seven task fMRI scans<sup>45</sup>. The seven collected task scans consisted of  
136 an emotion cognition task, a gambling reward task, a language task, a motor task, a  
137 relational reasoning task, a social cognition task, and a working memory task. Briefly,  
138 the emotion cognition task required making valence judgements on negative (fearful  
139 and angry) and neutral faces. The gambling reward task consisted of a card guessing  
140 game, where subjects were asked to guess the number on the card to win or lose  
141 money. The language processing task consisted of interleaving a language condition,  
142 which involved answering questions related to a story presented aurally, and a math  
143 condition, which involved basic arithmetic questions presented aurally. The motor task  
144 involved asking subjects to either tap their left/right fingers, squeeze their left/right toes,  
145 or move their tongue. The reasoning task involved asking subjects to determine whether  
146 two sets of objects differ from each other in the same dimension (e.g., shape or texture).  
147 The social cognition task was a theory of mind task, where objects (squares, circles,  
148 triangles) interacted with each other in a video clip, and subjects were subsequently  
149 asked whether the objects interacted in a social manner. Lastly, the working memory  
150 task was a variant of the N-back task. A complete description of these task paradigms  
151 and scans can be found in <sup>47</sup>.

152

### 153 *fMRI Preprocessing*

154 Minimally preprocessed data for both resting-state and task fMRI were obtained  
155 from the publicly available HCP data. We performed additional preprocessing steps for



156 resting-state fMRI, which included removing the first five frames of each run and  
157 performing nuisance regression on the minimally preprocessed data. Nuisance  
158 regression included removing the mean of each run, linear detrending, and regressing  
159 out 12 motion parameters (six motion parameter estimates and their derivatives), the  
160 mean white matter time series and its derivative, the mean ventricle time series and its  
161 derivative, and the mean global signal time series and its derivative.

162 Task data for task activation analyses were additionally preprocessed using a  
163 standard general linear model (GLM) for fMRI analysis. The first five frames of each run  
164 were removed prior to fitting the GLM. Nuisance regressors included 12 motion  
165 parameters, regressors for the mean ventricles, white matter, and global signals and  
166 their derivatives. In addition, for each task paradigm, we estimated the task-evoked  
167 activations of each task condition by fitting the task timing for each condition convolved  
168 with the SPM canonical hemodynamic response function. Two regressors were fit for  
169 the emotion cognition task, where coefficients were fit to either the face condition or  
170 shape condition. For the gambling reward task, one regressor was fit to trials with the  
171 punishment condition, and the other regressor was fit to trials with the reward condition.  
172 For the language task, one regressor was fit for the story condition, and the other  
173 regressor was fit to the math condition. For the motor task, six regressors were fit to  
174 each of the following conditions: (1) cue; (2) right hand trials; (3) left hand trials; (4) right  
175 foot trials; (5) left foot trials; (6) tongue trials. For the relational reasoning task, one  
176 regressor was fit to trials when the sets of objects were matched, and the other  
177 regressor was fit to trials when the objects were not matched. For the social cognition  
178 task, one regressor was fit if the objects were interacting socially (theory of mind), and  
179 the other regressor was fit to trials where objects were moving randomly. Lastly, for the  
180 working memory task, 8 regressors were fit to the following conditions: (1) 2-back body  
181 trials; (2) 2-back face trials; (3) 2-back tool trials; (4) 2-back place trials; (5) 0-back body  
182 trials; (6) 0-back face trials; (7) 0-back tool trials; (8) 0-back place trials. Given that all  
183 tasks were block designs, we fit one regressor for each task condition mentioned above.

#### 184 *FC estimation*

186 Resting-state FC was estimated using standard Pearson correlations on  
187 preprocessed resting-state fMRI (Fig. 2b). Whole-brain, region-to-region resting-state  
188 FC was estimated by computing the pairwise Pearson correlation between the mean  
189 time series of every pair of regions in the Glasser et al. (2016) atlas. Network  
190 dimensionality and NPS were carried out on the unthresholded, whole-brain FC matrix.  
191 Participation coefficient was computed on three different weighted thresholds: all  
192 positive FC weights, top 10% FC threshold, top 2% FC threshold.

193 It has been previously shown that resting-state FC estimated with multiple linear  
194 regression better predicts task-evoked activity flow over standard Pearson correlations<sup>1</sup>.  
195 Thus, when predicting activity flow over resting-state FC), we estimated the resting-  
196 state connectivity-based mapping using multiple regression FC. Using ordinary least  
197 squares regression, we calculated whole-brain, region-to-region FC estimates by  
198 obtaining the regression coefficients from the equation

$$\vec{x}_i = \beta_0 + \sum_{j \neq i}^N \beta_{ji} \vec{x}_j + \epsilon \quad (1)$$

199 for all regions  $x_i$ . We define  $\bar{x}_i$  as the time series in region  $x_i$ ,  $\beta_0$  as the y-intercept of the  
200 regression model,  $\beta_{ji}$  as the FC coefficient for the  $j$ th regressor/region (which we use as  
201 the element in the  $j$ th row and the  $i$ th column in the FC adjacency matrix), and  $\epsilon$  as the  
202 residual error of the regression model.  $N$  is the total number of regressors included in  
203 the model, which corresponds to the number of all brain regions. This provided an  
204 estimate of the contribution of each source region in explaining unique variance in the  
205 target region's time series. This approach of estimating FC is also described in<sup>1,9</sup>.

206

### 207 *Estimating basic network properties*

208 To first test the integrity of the network partition on the HCP data set, we  
209 estimated the averaged within-network FC for each subject (Supplementary Figure 1).  
210 To ensure that only strong FC values were contributing to our estimate of within-network  
211 connectivity, we applied a 2% FC threshold, a previously used threshold for graph  
212 analyses<sup>11</sup>. Only 10% of subjects had a non-zero within-network FC for the ORA, and  
213 only 1% of subjects had a non-zero within-network FC for the VMM. In other words, for  
214 the majority of subjects, these networks had no functional connections that survived a  
215 2% FC threshold.

216 To establish whether a network had the basic property of being a hub (i.e., high  
217 inter-network connectivity), we used several graph-theoretic techniques. We first used  
218 participation coefficient (Supplementary Figure 4), which measures the degree of inter-  
219 network connectivity at a given region/node. Given the difficulty in estimating  
220 participation coefficient with an unthresholded FC matrix, we used three different FC  
221 thresholds largely consistent with previous studies<sup>11,38,40</sup>: weighted positive-only FC  
222 values, 10% FC threshold, and 2% FC threshold. Participation coefficient estimated for  
223 each region was then averaged across regions within a network (for each subject  
224 separately) to obtain network level statistics for participation coefficient. Participation  
225 coefficient was implemented using the python version of Brain Connectivity Toolbox<sup>20</sup>  
226 (bctpy version 0.5.0).

227 We next estimated whether each network had a statistically significant functional  
228 connection (estimated using Pearson correlation during resting state) to every other  
229 network (Supplementary Figure 5). For all subjects, we performed the Fisher's z-  
230 transformation on all FC values, and performed a cross-subject, one-sided t-test for  
231 every functional connection. We then corrected for multiple comparisons using FWE  
232 permutation testing using 1000 permutations<sup>48</sup>. Statistical significance was assessed  
233 using an FWE-corrected  $p < 0.05$ . For each network, we counted whether or not that  
234 network contained a statistically significant connection to every other network.

235

### 236 *Network dimensionality measure*

237 We adapted a previously-developed measure used to study the dimensionality of  
238 activations across space<sup>18,49</sup> and applied it in a graph theoretical context. Specifically,  
239 we applied it to the out-of-network connectivity patterns of functional networks estimated  
240 using resting-state fMRI. The network dimensionality measure estimates the  
241 dimensionality of the out-of-network global connectivity space for each functional  
242 network. We first obtain the correlation matrix of the Fisher's z-transformed out-of-  
243 network connectivity space

$$A_c = \text{corr} \left( z(W_{i \in C, j \in C}) \right) \quad (2)$$

244 where  $W_{i \in C, j \in C}$  is the  $m \times n$  connectivity matrix (i.e., a subset of a the whole-brain,  
245 region-to-region adjacency matrix), where  $m$  refers to all regions within network  $C$ , and  $n$   
246 refers to all regions not in network  $C$ .  $z$  refers to the Fisher's  $z$ -transform, and  $corr$   
247 performs pairwise Pearson correlations between all rows of  $W_{i \in C, j \in C}$ , resulting in a  $A_C$ ,  
248 which is the  $m \times m$  correlation matrix from which we obtain eigenvalues. We then  
249 calculate

$$\mathbf{dim}_C = \frac{(\sum_{i=1}^m \lambda_i)^2}{\sum_{i=1}^m \lambda_i^2} \quad (3)$$

250 where  $\mathbf{dim}_C$  corresponds to the statistical dimensionality of network  $C$ , and  $\lambda_i$   
251 corresponds to the eigenvalues of the matrix  $A_C$ <sup>18,49</sup>.

252

253 *Network pattern separation measure*

254 We developed a new graph-theoretic measure – network pattern separation  
255 (NPS) – that characterizes the dissimilarity of global connectivity patterns between brain  
256 regions belonging to the same network (i.e., pattern-separated connectivity of a  
257 network). Using a recently defined set of functional network assignments of the Glasser  
258 et al. (2016) parcels<sup>19</sup>, we measured the NPS for each functional network.  
259 Mathematically, we defined the NPS of a network  $C$  as

$$NPS_C = \sum_{i \in C} \left( \sum_{j \in C, j \neq i} 1 - \text{scorr}(\vec{w}_{i, k \notin C}, \vec{w}_{j, k \notin C}) \right) / (N_C^2 - N_C) \quad (4)$$

260 where  $\text{scorr}$  refers to the Spearman's rank correlation,  $\vec{w}_{i, k \notin C}$  refers to the connectivity  
261 vector for brain region  $i$  to all other brain regions  $k$  not in network  $C$  (i.e., the out-of-  
262 network connectivity vector), and  $N_C$  refers to the number of regions in network  $C$ . NPS  
263 was computed for each subject separately using the subject's whole-brain Fisher's  $z$ -  
264 transformed FC matrix estimated with Pearson correlation. No threshold was applied to  
265 the matrix prior to computing NPS for each network. We compared the NPS values  
266 between pairs of functional networks by performing cross-subject t-tests for every pair of  
267 networks. We corrected for multiple comparisons using a False Discovery Rate-  
268 corrected (FDR)  $p$ -value of  $p < 0.05$ <sup>50</sup>.

269

270 *Decoding task information in functional networks using multivariate pattern analysis*

271 We performed multivariate pattern analysis<sup>51</sup> to decode task condition  
272 information for each of the seven HCP tasks. Whole-brain task condition activations  
273 were obtained via task GLM estimates as described above in the *fMRI preprocessing*  
274 subsection. We then segmented the whole-brain activation pattern for each subject into  
275 separate activation patterns for each functional network.

276 To estimate how much task information each functional network contained in its  
277 activation pattern, we performed a cross-validated  $n$ -way classification for each task  
278 separately, where  $n$  refers to the number of experimental conditions within each task  
279 (Supplementary Figure 2; Supplementary Table 1). We employed a leave-one-subject-  
280 out cross-validation scheme using random splits of the training set, which has been  
281 shown to produce more stable and robust decoding accuracies<sup>23</sup>. For each held-out  
282 subject, we used 100 random splits of the training data, each time randomly sampling  
283 with replacement 49 subjects to train on (approximately half of the training data), and



284 classifying a held-out subject's data. Thus, for each held-out subject, we generated 100  
285  $x n$  classification accuracies, from which we calculated a subject's average decoding  
286 accuracy. This approach had the advantage of allowing us to perform a random effects  
287 cross-subject t-test against chance (given the multiple decoding accuracies from each  
288 random split) rather than a fixed effects binomial test to calculate statistical significance.

289 Our decoder was trained using logistic regression. For tasks which had  $n > 2$   
290 conditions, we employed a multiclass classification approach with a one versus rest  
291 strategy for each class label. Logistic regression was implemented using the scikit-learn  
292 package (version 0.18) in Python (version 2.7.9). We then performed a cross-subject t-  
293 test to test whether the decoder could classify each condition within a task using a  
294 functional network's activation pattern significantly greater than chance. Since we ran  
295 classifications on all functional networks, we corrected for multiple comparisons using  
296 FDR. Statistical significance was assessed using an FDR-corrected  $p < 0.05$ .

297

### 298 *Estimating the representational flexibility of each functional network*

299 The above analysis illustrated that every functional network could decode task  
300 condition information significantly above chance. However, to better quantify the degree  
301 of decodability for each task, we measured the multivariate pattern distance between  
302 the activation patterns for each task condition using Mahalanobis distance<sup>22</sup>. We used  
303 Mahalanobis distance as opposed to decoding statistics (e.g., accuracy) given the more  
304 intuitive interpretation of distance between activation patterns to infer highly distinct (and  
305 therefore decodable) task representations.

306 We used the same cross-validation scheme as the above section for this  
307 analysis. To estimate the pattern distinctness of each condition for a subject using the  
308 distribution of activation patterns from all other subjects, for each task condition  
309  $C = \{c_1, \dots, c_n\}$ , we calculate the pattern distinctness  $\mathbf{PD}_{c_x}$  of condition  $c_x$  as

$$\mathbf{PD}_{c_x} = \mathbf{D}_M(\mathbf{v}_{c_x}, \bar{\mathbf{v}}_{c_x}) - \mathbf{D}_M(\mathbf{v}_{c_x}, \bar{\mathbf{v}}_{C \setminus \{c_x\}}) \quad (5)$$

310 where  $\mathbf{D}_M(\mathbf{x}, \mathbf{y})$  is the Mahalanobis distance of observation  $\mathbf{x}$  from the set of  
311 observations  $\mathbf{y}$ ,  $\mathbf{v}_{c_x}$  corresponds to the activation pattern during condition  $c_x$  for the held-  
312 out subject,  $\bar{\mathbf{v}}_{c_x}$  corresponds to the set of activation patterns during condition  $c_x$  for all  
313 subjects in the training sample determined by the random split, and  $\bar{\mathbf{v}}_{C \setminus \{c_x\}}$  corresponds  
314 to the set of activation patterns in the training sample for all conditions  $C$  excluding  $c_x$ . In  
315 other words, we measured the difference between matched conditions and mismatched  
316 conditions, for a held-out subject and a set of training subjects determined by the  
317 random split. For each subject, we then averaged the pattern distinctness of each  
318 condition across all random splits. This provided us with a single measure of how  
319 distinct the network's task activation patterns were across task conditions for each  
320 subject.

321 We performed this procedure for each task separately. To adjust for differences  
322 in distances across tasks (due to the possibility that certain tasks contain more distinct  
323 task conditions relative to others), we z-normalized the pattern distinctness (i.e.,  $\mathbf{PD}$ )  
324 across networks. This allowed us to compare the pattern distinctness of each network  
325 across tasks, while preserving the relative  $\mathbf{PD}$  of each network during a given task. We  
326 then computed the representational flexibility of each network by averaging the  
327 normalized  $\mathbf{PD}$  across tasks (Fig. 3a). The representational flexibility for each network  
328 score was calculated within subject.

329 Mahalanobis distance was calculated using SciPy version 1.0.0 (the “cdist”  
330 function) with Python version 2.7.9.

331  
332 *Mapping whole-brain representations to functional networks via information transfer*  
333 *mapping*

334 We recently developed a new procedure to characterize the role of resting-state  
335 FC in transferring task information<sup>9</sup>. Based on the concept of activity flow – the  
336 movement of activity between areas of the brain – via channels described by resting-  
337 state FC<sup>1</sup>, we constructed a connectivity-based mapping that predicts the activation  
338 pattern of a target network using activity from the rest of the brain. Mathematically, we  
339 define this mapping between a target network and regions outside that network as

$$\bar{\mathbf{B}}_k = \mathbf{A}_k \bullet W_{RSFC} \quad (6)$$

340 where  $\bar{\mathbf{B}}_k$  is a  $1 \times n$  vector corresponding to the predicted activation pattern for a target  
341 network (with  $n$  regions) for some task condition  $k$ ,  $\mathbf{A}_k$  is a  $1 \times m$  vector corresponding  
342 to the activation pattern for the rest of the brain (with  $m$  regions),  $W_{RSFC}$  corresponds to  
343 the  $m \times n$  matrix representing the region-to-region resting-state FC (estimated using  
344 multiple linear regression) between all regions outside the target network and regions  
345 inside the target network. Lastly, the operator  $\bullet$  refers to the dot product. This  
346 formulation allowed us to project activation patterns to a target network using activity  
347 from regions outside that network (i.e., a spatial transformation represented as matrix  
348 multiplication).

349 We tested whether the connectivity-based mapping could predict the transfer of  
350 information from regions outside the target network to the target network (Fig. 4b). This  
351 required a two-step process: (1) generating predicted activation patterns for each  
352 experimental condition in the target network by estimating the activity flow to the target  
353 network from the rest of the brain; (2) training a decoder on the activity flow-predicted  
354 activation patterns of that network, and then subsequently classifying the actual (non-  
355 activity flow-predicted) activation patterns of that network using a held-out subject's  
356 data. Note, the training set did not include any data from the to-be-predicted subject's  
357 data set, and also were exclusively generated from the activity flow-predicted  
358 activations of the target network using the connectivity-based mapping in equation 6.  
359 This approach ensured that the analyses were not circular and the predictions were  
360 two-fold: (1) predicting a held-out target network's activity; (2) predicting a held-out  
361 subject's data. We used the same cross-validation scheme as in the previous section.  
362 This involved a leave-one-subject out cross-validation with random splits on the training  
363 set using logistic regression. Success of this analysis would suggest that the  
364 connectivity-based mapping from out-of-network regions to a target network could  
365 accurately predict the target network's actual activation patterns for conditions within a  
366 task. This would demonstrate the role of a network's global connectivity organization in  
367 transferring information between out-of-network regions and a target network.

368 To assess the statistical significance of the activity flow-predicted activation  
369 patterns, we performed a one-sided t-test to assess whether decoding accuracies were  
370 greater than chance (where chance is  $1/n$ , and  $n$  corresponds to the number of task  
371 conditions). Statistical significance was assessed with an FDR-corrected  $p < 0.05$   
372 (Supplementary Figure 3; Supplementary Table 2).

373 As in the previous section, we used the scikit-learn package (version 0.18) in  
374 Python (version 2.7.9) to implement these analyses. Visualizations were mapped onto  
375 the parcellated surface using HCP's Connectome Workbench version 1.2.3<sup>52</sup>.

376  
377 *Predicting representational flexibility using activity flow estimates*

378 We wanted to demonstrate a direct relationship between the intrinsic global  
379 connectivity organization of functional networks with representational flexibility across a  
380 variety of tasks. Thus, we used the activity flow predictions of a target network across all  
381 tasks to predict the representational flexibility. In this way, the predicted representational  
382 flexibility was exclusively dependent on the combination of the intrinsic global  
383 connectivity organization of the target network and out-of-network task activations.

384 To predict the representational flexibility of a network using activity flow estimates  
385 from out-of-network regions, we first predicted a target network's activation pattern for  
386 each condition within a task as described above. Then, instead of training a decoder for  
387 classification, we estimated the activity flow-predicted representational flexibility using  
388 the same cross-validated Mahalanobis distance approach as when we calculated the  
389 actual representational flexibility of each network. This was done by calculating the  
390 Mahalanobis distance between a held-out subject's actual sample and the set of all  
391 other activity flow-predicted samples. In other words, we modified equation 5 and  
392 substituted the set of vectors  $\bar{v}_{c_x}$  and  $\bar{v}_{C \setminus \{c_x\}}$  with the set of activity flow-predictions of the  
393 target network (Fig. 5a).

394 To quantify the correspondence between the actual and activity flow-predicted  
395 representational flexibility across networks, we performed a cross-network rank  
396 correlation between the actual and predicted representational flexibility scores for each  
397 subject (Fig. 5b). To test for statistical significance, we performed a Fisher z-  
398 transformation on the rho values for each subject and performed a cross-subject t-test  
399 against 0.

400  
401 *Correlating intrinsic network properties to representational flexibility*

402 To see if variability in intrinsic network dimensionality could explain variability in  
403 network level representational flexibility, we performed several correlation analyses  
404 relating the two measures. We first evaluated whether cross-network variance in  
405 network dimensionality related to cross-network variance in representational flexibility.  
406 For each subject, we obtained statistics for every network for both network  
407 dimensionality and NPS. In addition, to compare these two measures with a more  
408 traditional graph-theoretic measure of inter-modular connectivity, we obtained network  
409 statistics for participation coefficient<sup>20</sup>. However, since participation coefficient is  
410 typically used after thresholding the whole-brain FC matrix, we measured the weighted  
411 participation coefficient using three different thresholds: positive threshold (all positive  
412 FC values), 10%, and 2% (Supplementary Figure 4)<sup>20</sup>. Then, for each subject, we  
413 correlated the cross-network representational flexibility with the cross-network network  
414 dimensionality, NPS, and participation coefficient at each of the FC matrix thresholds  
415 (Supplementary Tables 4 and 5). To test if FC dimensionality was significantly greater  
416 than the other measures, we computed a cross-subject t-test assessing if network  
417 dimensionality was greater than each of the other measures. We corrected for multiple

418 comparisons using FDR-correction, and assessed significance using an FDR-corrected  
419  $p < 0.05$ .

420 We next tested if cross-subject variability in network dimensionality could explain  
421 cross-subject variability in a network's representational flexibility. Thus, for each  
422 functional network, we performed a cross-subject rank correlation between a network's  
423 representational flexibility, and each of the graph-theoretic measures mentioned above.  
424 However, to ensure that the correlations were not confounded by mean differences of  
425 any of the graph-theoretic measures (e.g., mean network dimensionality across  
426 networks), we z-normalized the cross-network scores for network dimensionality, NPS,  
427 and participation coefficient within subject. For each graph-theoretic measure, we  
428 obtained a rank correlation and corresponding  $p$ -value for each functional network. We  
429 corrected for multiple comparisons using family-wise error correction (FWE) using  
430 permutation testing (with 1000 permutations; Nichols and Holmes, 2002). Statistical  
431 significance was assessed using a FWE-corrected  $p < 0.05$ .

432  
433 *Data and code availability*

434 All data is made publicly available through the HCP<sup>45</sup>. All code related to  
435 analyses conducted in this manuscript will be made publicly available upon publication.  
436 In the interim, code can be made available by request.

437 Code to compute participation coefficient was implemented by bctpy (version  
438 0.5.0; <https://github.com/aestrivex/bctpy>)<sup>20</sup>.

439 Code to control for FWE rates using permutation tests can be found here:  
440 <https://github.com/ColeLab/MultipleComparisonsPermutationTesting>

441  
442  
443

## 444 Results

445

### 446 *Estimating the dimensionality of a network's global connectivity patterns*

447 We first sought to estimate the specific network properties that we hypothesized  
448 might contribute to flexible cognitive processing. We hypothesized that high-dimensional  
449 hub networks (i.e., networks with high inter-network connectivity containing pattern-  
450 separated global connections) would demonstrate high involvement during a wide range  
451 of tasks. We reasoned that the combination of high inter-network connectivity and  
452 pattern-separated global connections would lead to both increased integrative network  
453 function while limiting information interference (Fig. 1a).

454 We used two complementary graph-theoretic measures to target the theoretical  
455 construct of a network's global dimensionality. First, we used *network dimensionality*,  
456 which was adapted from a previously-developed measure to study the dimensionality of  
457 spatial activation patterns in cerebellum<sup>18</sup>. Network dimensionality measures the  
458 dimensionality of a network's out-of-network global connections. However, given the  
459 possibility that the network dimensionality statistic could be biased by the size of each  
460 network, we also devised a novel graph-theoretic measure – *network pattern separation*  
461 (NPS) – that accounts for network size. Briefly, NPS measures the dissimilarity of out-  
462 of-network FC patterns between pairs of regions belonging to the same functional  
463 network, and then averages across dissimilarities within a network. Each of these  
464 measures targeted the theoretical concept of global dimensionality in complementary  
465 ways. NPS measures the dissimilarity of global connections between every pair of  
466 regions, and can be biased by smaller, ill-defined networks. In contrast, network  
467 dimensionality looks at the dimensionality of the collective global connections of a  
468 network, and can potentially be biased by the size of the network.

469 We computed the network dimensionality and NPS for every functional network  
470 (Fig. 2d,e). Though network dimensionality and NPS target a distinct theoretical  
471 construct relative to region-level measures such as participation coefficient, we ran a  
472 control analysis to demonstrate the uniqueness of these measures. We computed the  
473 participation coefficient for each network using weighted participation coefficient for  
474 each subject at three FC thresholds: all positive weights, 10% FC threshold, and 2% FC  
475 threshold (Supplementary Figure 4). To test the relationship between global  
476 dimensionality measures and participation coefficient across networks, we computed  
477 the cross-network rank correlation of network dimensionality and participation  
478 coefficient, as well as NPS and participation coefficient for each subject separately. We  
479 found no significant positive correlation between participation coefficient and either  
480 network dimensionality or NPS (all average  $\rho < 0.04$ ; all  $t_{99} < 1.70$ ; all  $p > 0.05$ ),  
481 suggesting that the measures targeting global dimensionality provide distinct  
482 information relative to participation coefficient.

483 Though we were interested in the broad relationship between global  
484 dimensionality and flexible activity-based representations, we also focused on  
485 differences between the FPN and other networks given our a priori hypothesis of the  
486 FPN as a flexible hub network. When comparing the FPN and other networks for each  
487 of the two graph-theoretic measures, we found that the FPN had the highest network  
488 dimensionality (pairwise t-test for FPN versus other networks, averaged  $t_{99} = 20.12$ ; FDR-  
489 corrected  $p < 0.0001$ ) and second highest NPS (pairwise t-test for FPN versus other



490 networks, averaged  $t_{99}=14.08$ ; FDR-corrected  $p<0.0001$ , except for FPN versus ORA  
491 FDR-corrected  $p>0.05$ ). The orbital affective (ORA) network had the highest NPS, but is  
492 a poorly defined network, as evidenced by extremely weak within-network FC  
493 (Supplementary Figure 1). In addition, it has previously been shown to be a poorly  
494 defined network, potentially due to low signal-to-noise ratio<sup>19</sup>. (In Spronk et al. 2017, the  
495 authors showed that the ORA had a network assignment confidence score that was two  
496 standard deviations below the mean.) Thus, we found that FPN had consistently high  
497 global dimensionality in the form of pattern-separated global connections, which we  
498 hypothesized to be a characteristic network property of an integrative, flexible hub  
499 network.

500 In addition to high global dimensionality, we wanted to ensure that FPN had the  
501 basic hub property of high inter-network connectivity. Thus, we computed the  
502 participation coefficient for all networks<sup>11,20</sup>. Using a weighted 2% FC threshold, we  
503 found that FPN had a significantly higher participation coefficient relative to the whole-  
504 brain average ( $t_{99}=15.37$ ; FDR-corrected  $p<0.0001$ ), indicating that the FPN is indeed a  
505 hub network. To next assess whether FPN's connectivity was truly global, we calculated  
506 whether FPN had at least one statistically significant functional connection to every  
507 other network. (Note, we define functional connection as a statistically significant  
508 correlation across all subjects.) Indeed, we found that FPN had at least one statistically  
509 significant functional connection to every other network estimated at the group level  
510 (significant connections, averaged  $r=0.13$ ;  $t_{99}=13.47$ ; FWE-corrected  $p<0.05$ ). Further,  
511 when calculating this statistic for all other networks, we found that almost every network  
512 (excluding VIS1, VMM, and PMM) had at least one significant functional connection to  
513 every other network (Supplementary Figure 5). This indicates that most networks are  
514 hub networks, in the simplistic sense that they have a functional connection to every  
515 other network. These findings suggest that simple hub measures alone cannot explain  
516 the dimensionality of a network's global connectivity patterns; instead, the global  
517 dimensionality of a network collectively emerges as a function of the differences of  
518 node-specific global connectivity patterns, a property not captured by existing network  
519 statistics.

520

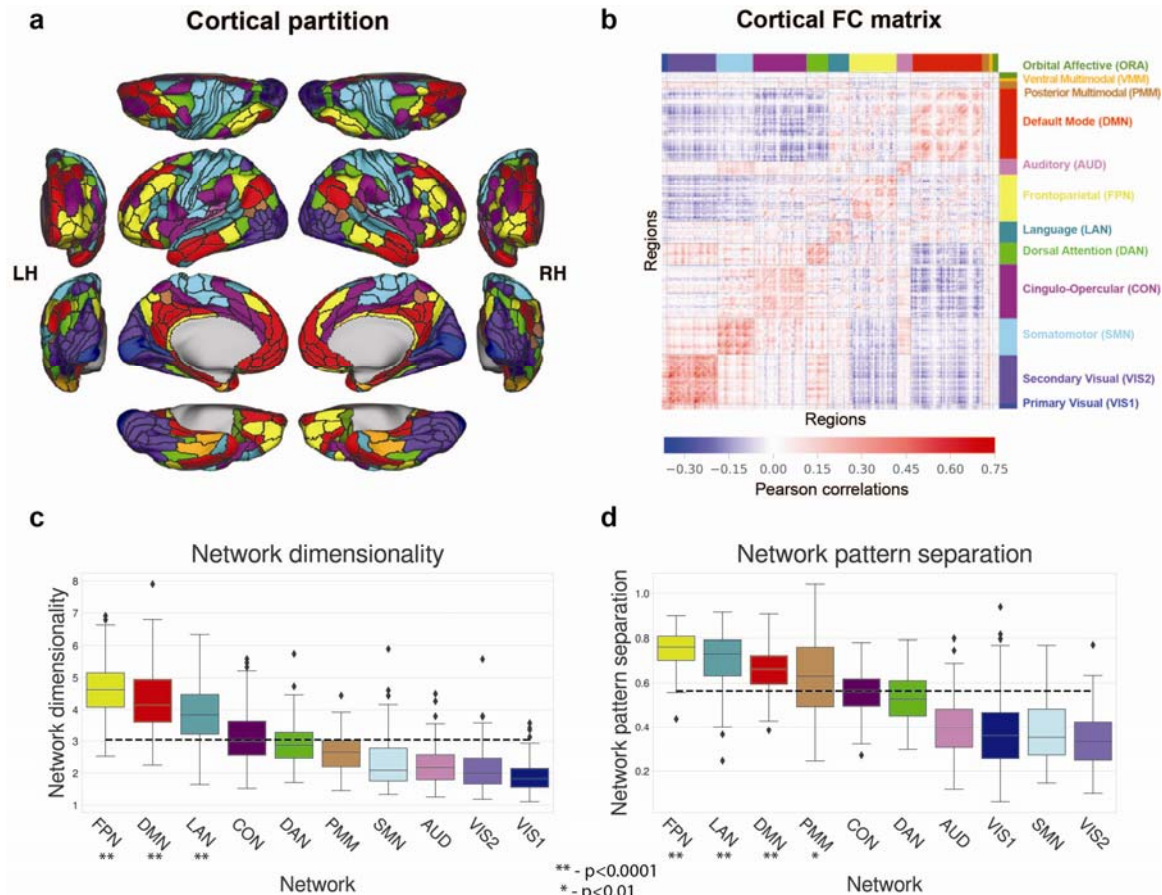

521  
 522 **Figure 2. Measuring the intrinsic network dimensionality of human functional brain**  
 523 **networks estimated with resting-state fMRI. a)** We used a cortical parcellation atlas  
 524 published in<sup>21</sup> with 360 parcels and a network partition of 12 functional networks estimated  
 525 during resting-state fMRI<sup>19</sup>. **b)** A whole-brain, functional connectivity matrix estimated with  
 526 standard Pearson correlations for every pair of brain regions. Regions are sorted by functional  
 527 networks, and are ordered according to the colored labels along the rows and columns. **c)** We  
 528 computed the network dimensionality for every functional network in the network partition. We  
 529 found that the FPN had the highest network dimensionality relative to all other functional  
 530 networks. **d)** We computed the network pattern separation (NPS) for every functional network in  
 531 the network partition. We found that the FPN had the highest NPS of all networks containing  
 532 strong within-network connectivity (Supplementary Figure 1). Note that the VMM and ORA  
 533 networks were not included since they had especially low within-network connectivity, raising  
 534 questions about their status as coherent networks. Asterisks denote that group-level t-statistics  
 535 were significantly greater than the cross-network mean. Boxplots represent the cross-subject  
 536 distribution and are organized as follows: lower and upper bounds of the box indicate the  
 537 quartiles of the distribution; whiskers extend to show the rest of the distribution with outliers  
 538 determined by the inter-quartile range; the line indicates the median. The dashed black lines in  
 539 panels **c** and **d** indicate the cross-network mean.

540  
 541 *Estimating the representational flexibility of functional networks using multivariate*  
 542 *pattern analysis*

543 We next sought to characterize a network's ability to flexibly represent task  
 544 information (i.e., representational flexibility). To estimate a network's representational

545 flexibility, we rely on the notion that patterns of task-related activity can represent task  
546 information<sup>22</sup>. We performed multivariate pattern analysis to decode task conditions  
547 within each task using network-level activation patterns. We used a leave-one-subject  
548 out cross-validation scheme with random splits on the training set, allowing us to  
549 generate an averaged decoding accuracy for each subject across the random splits<sup>23</sup>.  
550 We then performed a cross-subject t-test against chance to assess whether we could  
551 decode task conditions significantly above chance for each task. We found that across  
552 all seven HCP tasks, data from every network could be used to decode task information  
553 significantly above chance (Supplementary Figure 2; FDR-corrected  $p < 0.05$  for each  
554 task). This was unsurprising, since we had many subjects ( $n=100$ ) and trained each  
555 decoding model using distributed regions across large-scale networks. This suggested  
556 task-relevant information was widely distributed across many brain regions and  
557 functional networks, which is consistent with previous findings<sup>9,24,25</sup>.

558 Since all networks could decode task information with respect to statistical  
559 significance, we instead quantified the pattern distinctness of the activation patterns  
560 associated with each task condition. Using the same cross-validation scheme, we  
561 measured the average representational distance of each task condition (relative to the  
562 other task conditions within each task) using Mahalanobis distance<sup>26</sup>. This provided a  
563 measure for how distinct each network's task representations were, which allows for  
564 greater decodability. We then took the averaged Z-scored pattern distinctness across all  
565 tasks to obtain the measure of representational flexibility (Fig. 3a). Consistent with our  
566 hypothesis that FPN is a flexible hub network, we found that the FPN had the highest  
567 representational flexibility across all networks (averaged t-statistic for FPN versus each  
568 network  $t_{99}=11.74$ ; all FDR-corrected  $p < 0.0001$ ; Supplementary Table 3). These  
569 findings suggest FPN can flexibly represent task information, providing highly decodable  
570 task representations across a wide variety of tasks.

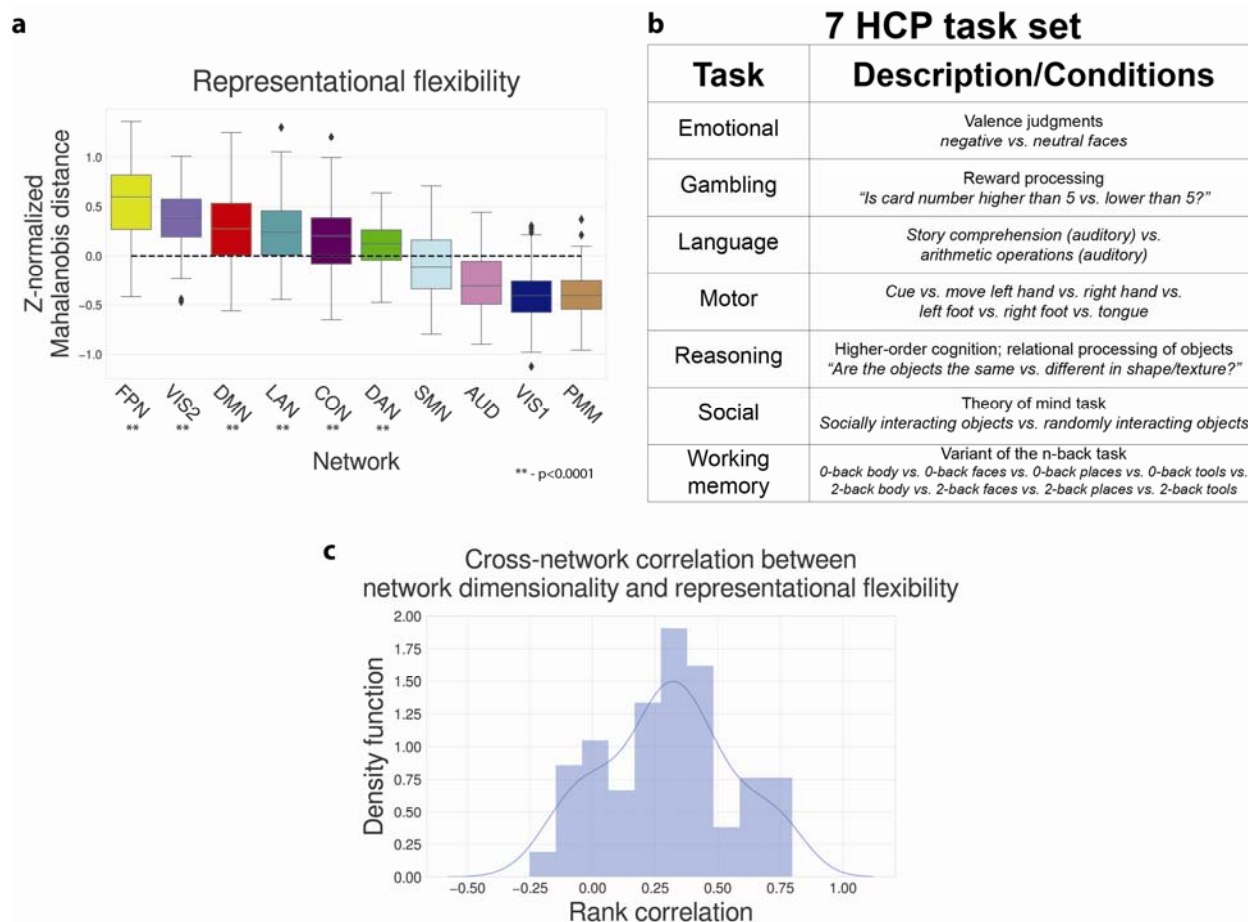

571  
572 **Figure 3. Network level representational flexibility and its relation to network**  
573 **dimensionality.** Boxplots represent the cross-subject distribution and are organized as follows:  
574 lower and upper bounds of the box indicate the quartiles of the distribution; whiskers extend to  
575 show the rest of the distribution with outliers determined by the inter-quartile range; the line  
576 indicates the median. Asterisks denote that group-level t-statistics were significantly greater  
577 than the cross-network mean. **a)** Representational flexibility of each functional network across  
578 the seven HCP tasks, sorted by mean from highest to lowest. We calculated the  
579 representational flexibility for each network by averaging the Z-scored Mahalanobis distance  
580 between each task condition within a task, across all seven tasks. This estimates the flexibility  
581 (i.e., pattern separation) of network level activation patterns between task conditions. The  
582 dashed black line indicates the cross-network mean. **b)** The 7 tasks used from the HCP data  
583 set. All tasks contained two experimental conditions, excluding the motor task (six conditions)  
584 and the working memory task (8 conditions). **c)** Cross-network correlation of representational  
585 flexibility with network dimensionality. For each subject, we performed a cross-network rank  
586 correlation between representational flexibility and network dimensionality. The histogram  
587 represents the distribution of correlations across subjects estimated with a Gaussian kernel  
588 density function. Network dimensionality significantly correlated with representational flexibility  
589 (average  $\rho = 0.33$ ;  $t_{99}$  vs.  $0 = 10.77$ ;  $p < 0.0001$ ).

590  
591 *Relating global dimensionality to representational flexibility*

592 We hypothesized that networks with high-dimensional global connectivity  
593 patterns would produce flexible representations that are highly decodable. The



594 preceding results identified these two properties of functional networks using  
595 independent data: resting-state data was used to identify the global dimensionality of  
596 networks, and task data was used to estimate the representational flexibility of  
597 networks. We next sought to determine whether these two independent measures are  
598 related to one another.

599 We first performed a simple cross-network rank correlation between network  
600 dimensionality and representational flexibility, and NPS and representational flexibility.  
601 As a comparison, we also correlated representational flexibility and participation  
602 coefficient. We computed the cross-network rank correlation of every subject's  
603 representational flexibility with each graph-theoretic measure separately (Fig. 3c). We  
604 found that network dimensionality significantly explained cross-network variance in  
605 representational flexibility (cross-subject mean  $\rho=0.33$ ; t-test versus 0,  $t_{99}=10.77$ ;  
606  $p<0.0001$ ; Supplementary Table 4). We further demonstrate that network dimensionality  
607 significantly explains more cross-network variance of representational flexibility than all  
608 other measures (Supplementary Figure 5), including participation coefficient (averaged  
609  $t_{99}$  across all FC thresholds=9.87; FDR-corrected  $p<0.05$ ). This suggests that the  
610 dimensionality of a network's global connectivity patterns can explain a network's ability  
611 to flexibly represent task information more than a previously method used to infer  
612 integrative network function (i.e., participation coefficient).

613 While the above analysis describes a simple correlative relationship between  
614 task-based representational flexibility and the intrinsic network properties estimated  
615 from resting-state fMRI, the analysis does not implicate a network mechanism relating  
616 the two properties. Thus, we next wanted to test whether the organization of a network's  
617 intrinsic global connectivity patterns could – via a mechanistic model of how connectivity  
618 influences task activations<sup>1,9</sup> – predict the representational flexibility of a network.  
619 Explicit prediction of a network's representational flexibility using the network's global  
620 connectivity organization would more rigorously test the hypothesis that its global  
621 connectivity organization is critical to its ability to flexibly integrate a wide variety of task-  
622 relevant information.

623 Recent work has demonstrated that the intrinsic FC architecture estimated during  
624 resting-state fMRI accurately describes the routes of activity flow – the movement of  
625 task-evoked activations between regions – during tasks<sup>1</sup> (Fig. 4a). We recently  
626 validated a new procedure – information transfer mapping – to infer the transfer of task  
627 information between two brain areas by mapping task representations between those  
628 regions<sup>9</sup>. Briefly, the procedure involves two steps: (1) mapping estimated activity flow  
629 from a source area to a target area using a resting-state connectivity-based mapping,  
630 and (2) information decoding of the actual activation pattern by a decoder trained on the  
631 activity flow-predicted activation patterns. We sought to build on these findings to  
632 demonstrate that the organization of a network's intrinsic global connections can explain  
633 a network's ability to integrate diverse sets of task-evoked information for flexible task  
634 representation.

635 To map activity to a target network using brain regions outside of that network,  
636 we first estimated a connectivity-based mapping by obtaining the resting-state FC  
637 patterns between regions in the target network and regions outside the network. We  
638 then predicted the task activation pattern in the target network by transforming  
639 activations from out-of-network regions into the spatial dimensions of the target network



640 (Fig. 4b). Briefly, this involved calculating the weighted sum of all out-of-network  
 641 regions' activations weighted by the to-be-predicted region's connections. To see how  
 642 well these connectivity-based mappings preserved task information in the target  
 643 network, we trained a decoder using the activity flow-predicted activation patterns, and  
 644 tested that decoder with the network's actual activation pattern for a held-out subject. By  
 645 training the decoder using predicted activation patterns and testing on the actual  
 646 activation patterns, this approach required that the activity flow-predicted activation  
 647 patterns retained representations that were in the same representational geometry as  
 648 the original activation pattern. Success with this procedure would suggest that the  
 649 network's intrinsic global connectivity organization was responsible for its ability to  
 650 integrate widespread information from the rest of the brain.  
 651

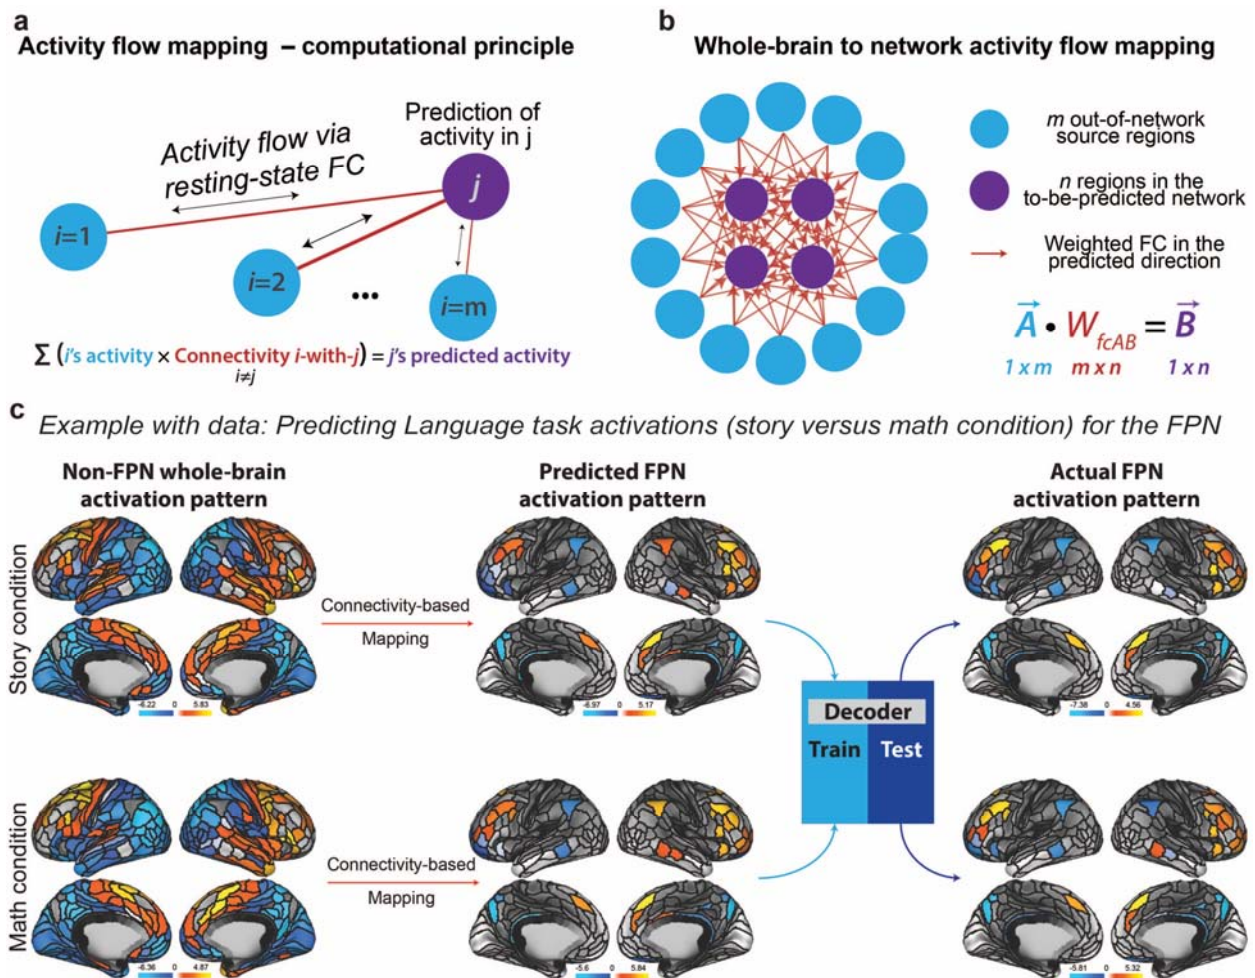

652 **Figure 4. Network level task activation patterns can be predicted by estimating activity**  
 653 **flow (the movement of task activations) over each network's intrinsic global connectivity**  
 654 **pattern. a)** The basic computational principle of activity flow mapping<sup>1</sup>. Activity flow to a held-out  
 655 region can be estimated by computing the linear weighted sum of a set of regions' activity  
 656 weighted by the resting-state FC to the to-be-predicted region. Figure adapted with permission  
 657 from <sup>1</sup>. **b)** Whole-brain to target network activity flow mapping. We predicted a network's task-  
 658 evoked activation pattern by estimating the activity flow from each region outside the to-be-  
 659 predicted network to each region in the network. **c)** As an example, we illustrate the prediction  
 660 of the FPN's activation pattern for task conditions within the Language task. The activity of each  
 661

662 FPN region was predicted by computing the linear weighted sum of the activity of all non-FPN  
663 regions weighted by the resting-state FC value to each FPN region. This procedure was  
664 performed to produce a predicted activation pattern for the FPN for each task condition. We  
665 subsequently trained a decoder using the predicted FPN activation patterns, and then classified  
666 the actual FPN activation patterns using a held-out subject's data. This procedure was repeated  
667 for each network and every HCP task.

668  
669 We performed the information transfer mapping procedure using activations from  
670 out-of-network regions to a target network for every functional network (see Fig. 4c for  
671 an example). We then computed a network's representational flexibility based on the  
672 predicted activation pattern for that network (Fig. 5a). To see how well the activity flow-  
673 predicted representational flexibility scores recapitulated the actual representational  
674 flexibility scores for each network, we performed a cross-network rank correlation  
675 between the actual and predicted representational flexibility scores for each subject  
676 (Fig. 5b). We found that the activity flow-predicted representational flexibility accurately  
677 recapitulated its representational flexibility across networks (mean  $\rho=0.71$ ;  $t_{99}=22.39$ ;  
678  $p<0.0001$ ). These findings suggest that the inter-network variability of representational  
679 flexibility can be explained, in part, by the intrinsic global connectivity organization of  
680 these networks. More broadly, this implicates a network mechanism for flexible  
681 representation, suggesting that the dimensionality of a network's intrinsic global  
682 connections takes part in determining the flexibility of task representation in large-scale  
683 networks.  
684

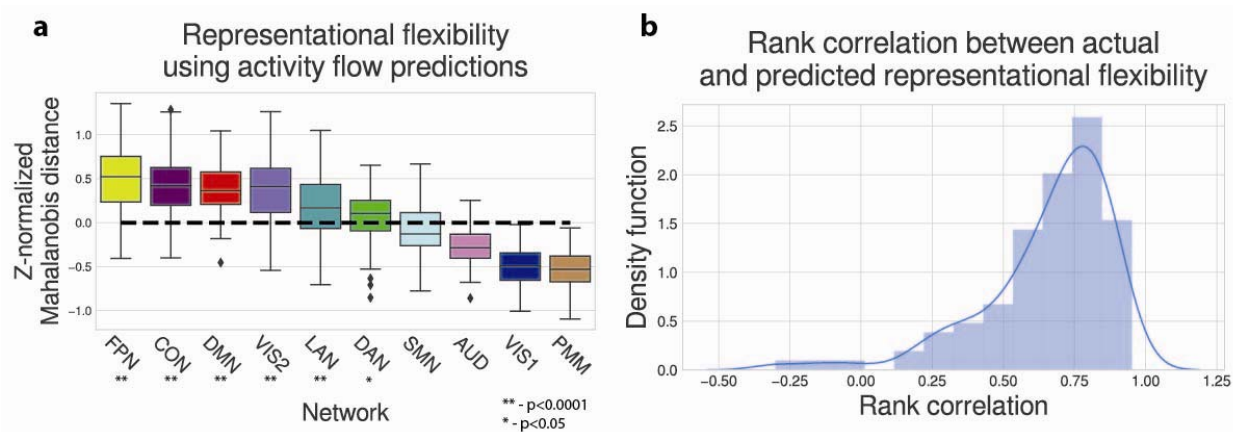

685  
686 **Figure 5. Predicting a network's representational flexibility by estimating activity flow**  
687 **over its intrinsic global network organization. a)** The predicted representational flexibility for  
688 each functional network using the estimated activity flow over its global network connections  
689 estimated during resting-state. Using the activity flow approach, we generated predicted  
690 activation patterns for each network. (Note that the actual activation pattern of each functional  
691 network was excluded in generating the predicted activation pattern.) Consistent with our  
692 hypothesis, FPN had the highest predicted representational flexibility across all networks  
693 (pairwise t-test for FPN versus every network, averaged  $t_{99}=11.74$ ; all FDR-corrected  $p<0.05$ ).  
694 Asterisks denote that group-level t-statistics were significantly greater than the cross-network  
695 mean. Boxplots represent the cross-subject distribution and are organized as follows: lower and  
696 upper bounds of the box indicate the quartiles of the distribution; whiskers extend to show the  
697 rest of the distribution with outliers determined by the inter-quartile range; the line indicates the  
698 median. The dashed black line indicates the cross-mean network. **b)** The subject-wise

699 distribution of cross-network correlations between the actual and predicted representational  
700 flexibility, estimated with a Gaussian kernel density function. For each subject, we performed a  
701 rank correlation across networks between the actual and predicted representational flexibility.  
702 The average rank correlation across subjects was  $\rho=0.71$  (t-test versus 0,  $t_{99}=22.39$ ;  
703  $p<0.0001$ ).

704  
705 *Global dimensionality of FPN correlates with its representational flexibility across*  
706 *individuals*

707 The preceding results demonstrated that across networks, global dimensionality  
708 correlates with representational flexibility. We next sought to better establish this  
709 relationship between global dimensionality and representational flexibility by additionally  
710 testing for individual difference correlations between them. This would demonstrate that  
711 individuals having especially high global dimensionality tend to have especially high  
712 representational flexibility.

713 For each network, we performed a cross-subject rank correlation of  
714 representational flexibility with each of the measures targeting global dimensionality, as  
715 well as participation coefficient (Fig. 6a,c,e). For participation coefficient, we used a 2%  
716 thresholded weighted FC matrix, based on previous success using this threshold with  
717 participation<sup>11,13</sup>. Similar results were found at a 10% threshold and without any  
718 threshold. We found that representational flexibility did not significantly correlate across  
719 individuals with participation coefficient for any network (cross-network average  
720  $\rho=0.01$ ; all  $p>0.05$ ; Fig. 6e). However, we found that the FPN's representational  
721 flexibility significantly correlated across individuals with both its network dimensionality  
722 ( $\rho=0.30$ ;  $p=0.003$ ; FWE-corrected  $p=0.014$ ) and NPS ( $\rho=0.34$ ;  $p=0.0005$ ; FWE-  
723 corrected  $p=0.001$ ), though this relationship did not hold with other networks (all FWE-  
724 corrected  $p>0.05$ ; Fig. 6b,d). In other words, the network dimensionality and NPS of the  
725 FPN, which both target the theoretical concept of global dimensionality (i.e., pattern-  
726 separated global connections), relate to the inter-individual variability of the FPN's  
727 representational flexibility. This suggests that our notion of global dimensionality  
728 accurately provides an explanatory relationship to the network-level representational  
729 flexibility of the FPN.

730



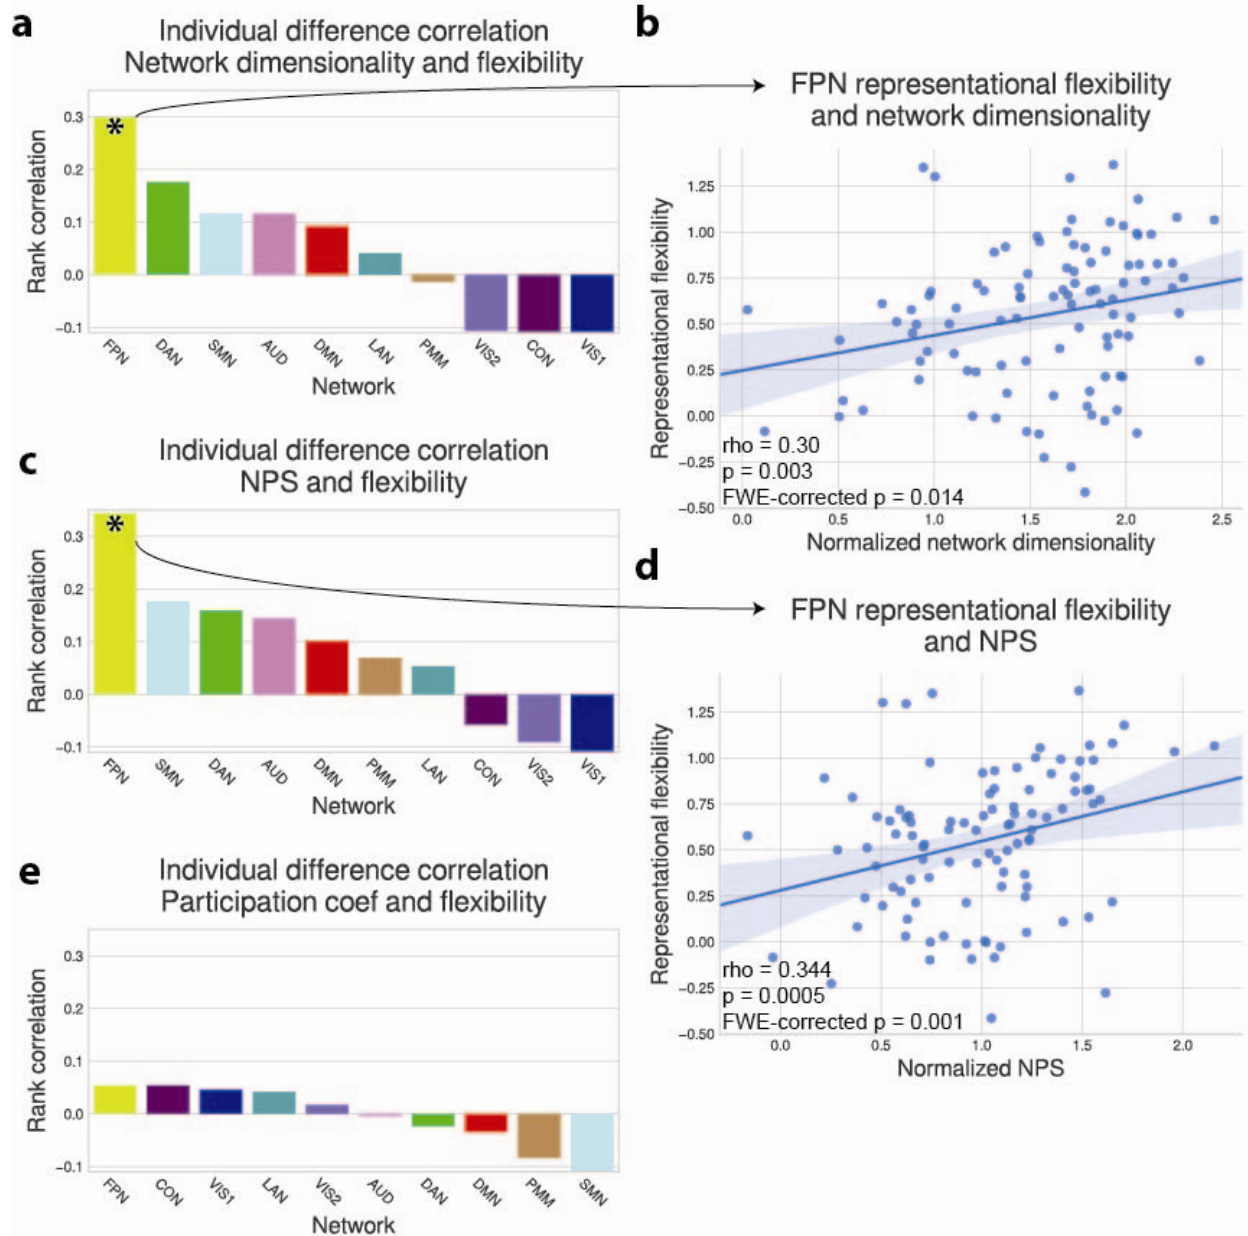

731  
732 **Figure 6. Individual difference correlation between network-level representational**  
733 **flexibility and corresponding intrinsic network properties.** We performed rank correlations  
734 between a network's representational flexibility with an intrinsic network property (i.e., network  
735 dimensionality, NPS, and participation coefficient) across individuals. **a)** Individual difference  
736 rank correlation between representational flexibility and network dimensionality demonstrated a  
737 significant correlation with the FPN. **b)** Scatter plot and best-fit line between FPN's  
738 representational flexibility and network dimensionality ( $\rho=0.30$ ; FWE-corrected  $p=0.014$ ). Data  
739 points represent individual subjects. The translucent blue band around the best-fit line  
740 represents the 95% confidence interval. **c)** Individual difference correlation between  
741 representational flexibility and NPS across individuals. **d)** Scatter plot and best-fit line between  
742 FPN's representational flexibility and NPS ( $\rho=0.34$ ; FWE-corrected  $p=0.001$ ). **e)** Individual  
743 difference correlation between representational flexibility and participation coefficient. No  
744 networks had a significant cross-subject correlation.

## 745 Discussion

746 Flexible representation of cognitive information likely requires the integration of  
747 diverse signals with minimal interference. Though recent studies have characterized the  
748 neurophysiological mechanisms underlying flexible cognitive control at the single and  
749 multi-cell level<sup>4,25,28</sup>, it has been unclear what mechanisms might allow for flexible  
750 representation at higher levels of organization. In this study, we identified a theoretical  
751 property of large-scale networks likely involved in the ability to integrate diverse sets of  
752 information with minimal signal interference: high-dimensional, pattern-separated global  
753 connectivity (i.e., high global dimensionality). Related measures of dimensionality have  
754 been previously used to study the complexity of the brain's activation spaces<sup>18,29</sup>, and  
755 have also been hypothesized to be related to conscious integration of information<sup>30</sup>.  
756 Additionally, studies in the hippocampus have demonstrated the importance of pattern-  
757 separated representations for episodic recall<sup>31</sup>. However, a direct relationship between  
758 the human brain's large-scale network organization and flexible decoding of task-  
759 evoked activity has remained elusive. The present results provide a concrete link that  
760 suggests a mechanism of flexible representation of task information via high-  
761 dimensional global connectivity.

762 A recent study provided computational evidence demonstrating that the local  
763 connectivity densities of neuronal ensembles are closely related to their  
764 representational capacity in cerebellum<sup>18</sup>. Here we demonstrate that analogous  
765 principles also apply at the large-scale network level. However, rather than focusing on  
766 synaptic connectivity densities and cellular mechanisms such as synaptic plasticity, we  
767 used large-scale network analyses using spontaneous fluctuations to target intrinsic  
768 global network properties. Additionally, to study the representational flexibility of these  
769 large-scale networks, we used the decoding of multivariate task representations, which  
770 have been linked to the successful performance of cognitive tasks<sup>4,16,32</sup>. We reasoned  
771 that networks that had highly decodable activation patterns across a variety of tasks  
772 most flexibly represented task information. By directly related intrinsic network  
773 organization with activation-based representational flexibility, our findings implicate a  
774 network mechanism that contributes to the emergence of flexible hub networks via  
775 intrinsic network organization.

776 Recent findings have implicated the FPN as a flexible hub network for adaptive  
777 task control<sup>8</sup>, providing evidence that regions within this network are functionally  
778 flexible<sup>15</sup>. Further, the intrinsic properties of the FPN have been shown to correlate  
779 across individuals with cognitive ability<sup>33-35</sup>. Consistent with the flexible hub theory of  
780 the FPN, we found that the FPN contained highly flexible representations across tasks.  
781 However, our results provide a link between the static intrinsic network organization of  
782 the FPN and its ability to flexibly represent cognitive information. This finding suggests  
783 that the flexible nature of the FPN is driven by a static network property, global  
784 dimensionality, which is estimated during a separate cognitive state (resting state).

785 Previous work has shown that the large-scale network architecture estimated at  
786 rest is largely preserved during task states<sup>36,37</sup>. Given this strong correspondence of  
787 intrinsic and task-evoked network architectures, the contributions of static resting-state  
788 network properties to flexible cognitive representations (in the form of flexible activation  
789 patterns) has remained unclear. Recent evidence has suggested that the intrinsic  
790 network connections estimated from spontaneous activity likely reflect the channels by



791 which task-evoked activity propagates between brain regions<sup>1,2,9</sup>, providing evidence  
792 that estimated intrinsic functional connections reflect the capacity for inter-region  
793 communication. Building on these findings, the present results provide evidence that a  
794 static property of intrinsic functional networks – global dimensionality – contributes to a  
795 network’s ability to flexibly represent cognitive task information.

796 The finding that the global dimensionality of networks contributes to their ability to  
797 flexibly represent cognitive information has several broader implications. First, it  
798 suggests that a network’s global dimensionality estimated during resting state reflects  
799 the representational capacity of that network during task states. Second, it provides a  
800 specific property of network organization that can be leveraged to design future network  
801 models and architectures that can maximize representational ability. Lastly, it improves  
802 upon the previously described notion that rich club networks (or diverse club networks)  
803 underlie integrative network function<sup>38–40</sup>. In contrast to previous studies focusing on rich  
804 and diverse club networks, which typically characterized networks by averaging region-  
805 level connectivity properties such as weighted degree centrality<sup>12,41,39</sup> or participation  
806 coefficient<sup>38,40</sup>, we sought to further characterize specific topological features emergent  
807 at the network level that might contribute to flexible representations. Global  
808 dimensionality takes into account the collective global connections of a network and the  
809 degree to which they target distinct sets of regions. Thus, global dimensionality refines  
810 the concept of an integrative hub network by taking into account the collective  
811 dimensionality of all global connections belonging to a network.

812 Though most studies in cognitive neuroscience are limited to a single  
813 experimental paradigm, we leveraged the HCP’s multi-task dataset to investigate the  
814 brain-behavior relationship underlying flexible cognitive representation. Despite this  
815 advantage, our measure of representational flexibility was still constrained by the seven  
816 cognitive tasks included in the HCP dataset. As a particularly prominent example of a  
817 limitation of this dataset, all but the Language task used only visual stimuli. Thus, while  
818 neuroimaging studies with human participants becomes more difficult as the number of  
819 tasks increases (largely due to the experimental duration), recent advances in  
820 computational modeling has made it tractable to study the computational properties of  
821 models able to perform large number of tasks<sup>42</sup>. It will thus be important for future work  
822 to find converging evidence from both empirical and computational studies to study the  
823 neural and computational basis of flexible task representation.

824 Another limitation of this study is that the information transfer mapping procedure  
825 used to link intrinsic FC organization and task activation patterns assumes a linear  
826 relationship between sets of regions. While this provides a simple approach to  
827 approximate the flow of activity between brain regions with minimal assumptions, neural  
828 processing is typically thought to rely on nonlinear information transformation through a  
829 sequence of processing pipelines, such as in the ventral visual stream<sup>43</sup>. Further,  
830 transformation of information via recurrent network connections is also thought to be  
831 crucial for many cognitive tasks<sup>42,44</sup>, as well as for pattern completion in hippocampal  
832 networks<sup>17</sup>. Thus, future work elucidating the contribution of nonlinear neural  
833 transformations through either feedforward or recurrent network architectures will be  
834 important to understand how information is transformed between brain systems.

835 In summary, we used graph-theoretic analysis of resting-state networks and  
836 information decoding across a wide range of tasks to show the co-occurrence of a

837 network's global dimensionality and its ability to flexibly represent task information. We  
838 then demonstrated that information from the whole brain can be mapped to specific  
839 networks by inferring the transfer of information over a network's global connectivity  
840 organization. These results demonstrate the close relationship between global  
841 dimensionality and representational flexibility at the large-scale network level,  
842 implicating a network mechanism underlying flexible representation for adaptive task  
843 control. We expect these findings to prompt further research into the relationship  
844 between network properties and their ability to produce cognitive representations,  
845 providing a deeper insight into the mechanisms underlying flexible cognitive control.  
846

#### 847 **Author Contributions**

848 T.I. and M.W.C. designed the study and the methodological tools. T.I. preprocessed and  
849 analyzed the data. T.I. and M.W.C. wrote the manuscript.

850

851 **Conflict of Interest:** None

852

853 **Acknowledgements:** We thank Travis E. Baker, Vincent B. McGinty, Joan I. Morrell,  
854 and Laszlo Zaborszky for feedback on earlier drafts of the manuscript. We also thank  
855 Miguel Vivar Lazo for helpful discussions pertaining to the integrated pattern diversity  
856 measure. Data were provided by the Human Connectome Project, WU-Minn  
857 Consortium (Principal Investigators: D. Van Essen and K. Ugurbil; 1U54MH091657)  
858 funded by the 16 NIH Institutes and Centers that support the NIH Blueprint for  
859 Neuroscience Research; and by the McDonnell Center for Systems Neuroscience at  
860 Washington University. The authors acknowledge support by the US National Institutes  
861 of Health under awards R01 AG055556 and R01 MH109520. The content is solely the  
862 responsibility of the authors and does not necessarily represent the official views of any  
863 of the funding agencies.

864 **References**

- 865
- 866 1. Cole, M. W., Ito, T., Bassett, D. S. & Schultz, D. H. Activity flow over resting-state  
867 networks shapes cognitive task activations. *Nat. Neurosci.* (2016).  
868 doi:10.1038/nn.4406
- 869 2. Tavor, I. *et al.* Task-free MRI predicts individual differences in brain activity during  
870 task performance. *Science (80-. )*. **352**, 1773–1776 (2016).
- 871 3. Fusi, S., Miller, E. K. & Rigotti, M. Why neurons mix: high dimensionality for  
872 higher cognition. *Curr. Opin. Neurobiol.* **37**, 66–74 (2016).
- 873 4. Rigotti, M. *et al.* The importance of mixed selectivity in complex cognitive tasks.  
874 *Nature* **497**, 1–6 (2013).
- 875 5. Cohen, J. D., Dunbar, K. & McClelland, J. L. On the control of automatic  
876 processes: a parallel distributed processing account of the Stroop effect. *Psychol.*  
877 *Rev.* **97**, 332–61 (1990).
- 878 6. Rumelhart, D. E., Hinton, G. E., McClelland, J. L. & others. A general framework  
879 for parallel distributed processing. *Parallel Distrib. Process. Explor. Microstruct.*  
880 *Cogn.* **1**, 45–76 (1986).
- 881 7. Cole, M. W. & Schneider, W. The cognitive control network: Integrated cortical  
882 regions with dissociable functions. *Neuroimage* **37**, 343–360 (2007).
- 883 8. Cole, M. W. *et al.* Multi-task connectivity reveals flexible hubs for adaptive task  
884 control. *Nat. Neurosci.* **16**, 1348–1355 (2013).
- 885 9. Ito, T. *et al.* Cognitive task information is transferred between brain regions via  
886 resting-state network topology. *Nat. Commun.* (2017). doi:10.1038/s41467-017-  
887 01000-w
- 888 10. Dosenbach, N. U. F. *et al.* Distinct brain networks for adaptive and stable task  
889 control in humans. *Proc. Natl. Acad. Sci. U. S. A.* **104**, 11073–11078 (2007).
- 890 11. Power, J. D. *et al.* Functional Network Organization of the Human Brain. *Neuron*  
891 **72**, 665–678 (2011).
- 892 12. Cole, M. W., Pathak, S. & Schneider, W. Identifying the brain's most globally  
893 connected regions. *Neuroimage* **49**, 3132–3148 (2010).
- 894 13. Power, J. D., Schlaggar, B. L., Lessov-Schlaggar, C. N. & Petersen, S. E.  
895 Evidence for hubs in human functional brain networks. *Neuron* **79**, 798–813  
896 (2013).
- 897 14. Smith, S. M. *et al.* Correspondence of the brain's functional architecture during  
898 activation and rest. *Proc. Natl. Acad. Sci. U. S. A.* **106**, 13040–13045 (2009).
- 899 15. Yeo, B. T. T. *et al.* Functional specialization and flexibility in human association  
900 cortex. *Cereb. Cortex* **25**, 3654–3672 (2015).
- 901 16. Waskom, M. L., Kumaran, D., Gordon, A. M., Rissman, J. & Wagner, A. D.  
902 Frontoparietal representations of task context support the flexible control of goal-  
903 directed cognition. *J. Neurosci.* **34**, 10743–55 (2014).
- 904 17. Yassa, M. A. & Stark, C. E. L. Pattern separation in the hippocampus. *Trends*  
905 *Neurosci.* **34**, 515–525 (2011).
- 906 18. Litwin-Kumar, A., Harris, K. D., Axel, R., Sompolinsky, H. & Abbott, L. F. Optimal  
907 Degrees of Synaptic Connectivity. *Neuron* **0**, 1153–1164.e7 (2017).
- 908 19. Spronk, M. *et al.* Mapping the human brain's cortical-subcortical functional  
909 network organization. *bioRxiv* (2017).

- 910 20. Rubinov, M. & Sporns, O. Complex network measures of brain connectivity: Uses  
911 and interpretations. *Neuroimage* **52**, 1059–1069 (2010).
- 912 21. Glasser, M. F. *et al.* A multi-modal parcellation of human cerebral cortex. *Nature*  
913 1–11 (2016). doi:10.1038/nature18933
- 914 22. Diedrichsen, J. & Kriegeskorte, N. Representational models: A common  
915 framework for understanding encoding, pattern-component, and representational-  
916 similarity analysis. *PLOS Comput. Biol.* **13**, e1005508 (2017).
- 917 23. Varoquaux, G. *et al.* Assessing and tuning brain decoders: Cross-validation,  
918 caveats, and guidelines. *Neuroimage* **145**, 166–179 (2017).
- 919 24. Gonzalez-Castillo, J. *et al.* Whole-brain, time-locked activation with simple tasks  
920 revealed using massive averaging and model-free analysis. *Proc. Natl. Acad. Sci.*  
921 *U. S. A.* **109**, 5487–92 (2012).
- 922 25. Siegel, M., Buschman, T. J. & Miller, E. K. Cortical information flow during flexible  
923 sensorimotor decisions. *Science* (80-. ). **348**, 1352–55 (2015).
- 924 26. Kriegeskorte, N. & Kievit, R. A. Representational geometry: Integrating cognition,  
925 computation, and the brain. *Trends Cogn. Sci.* **17**, 401–412 (2013).
- 926 27. Felleman, D. J. & Van Essen, D. C. Distributed hierarchical processing in the  
927 primate cerebral cortex. *Cereb. Cortex* **1**, 1–47 (1991).
- 928 28. Stokes, M. G. *et al.* Dynamic coding for cognitive control in prefrontal cortex.  
929 *Neuron* **78**, 364–375 (2013).
- 930 29. Tononi, G., Edelman, G. M. & Sporns, O. Complexity and coherency: integrating  
931 information in the brain. (1998).
- 932 30. Tononi, G., Sporns, O. & Edelman, G. M. A measure for brain complexity:  
933 Relating functional segregation and integration in the nervous system.  
934 *Neurobiology* **91**, 5033–5037 (1994).
- 935 31. Leal, S. L. & Yassa, M. A. Integrating new findings and examining clinical  
936 applications of pattern separation. *Nat. Neurosci.* (2018). doi:10.1038/s41593-  
937 017-0065-1
- 938 32. Cole, M. W., Ito, T. & Braver, T. S. The Behavioral Relevance of Task Information  
939 in Human Prefrontal Cortex. *Cereb. Cortex* bhv072- (2015).  
940 doi:10.1093/cercor/bhv072
- 941 33. Hilger, K., Ekman, M., Fiebach, C. J. & Basten, U. Intelligence is associated with  
942 the modular structure of intrinsic brain networks. *Sci. Rep.* 1–12 (2017).  
943 doi:10.1038/s41598-017-15795-7
- 944 34. Cole, M. W., Yarkoni, T., Repovs, G., Anticevic, A. & Braver, T. S. Global  
945 connectivity of prefrontal cortex predicts cognitive control and intelligence. *J.*  
946 *Neurosci.* **32**, 8988–99 (2012).
- 947 35. Woolgar, A. *et al.* Fluid intelligence loss linked to restricted regions of damage  
948 within frontal and parietal cortex. *Proc. Natl. Acad. Sci.* **107**, 14899 LP-14902  
949 (2010).
- 950 36. Cole, M. W., Bassett, D. S., Power, J. D., Braver, T. S. & Petersen, S. E. Intrinsic  
951 and task-evoked network architectures of the human brain. *Neuron* **83**, 238–251  
952 (2014).
- 953 37. Krienen, F. M., Yeo, B. T. T. & Buckner, R. L. Reconfigurable task-dependent  
954 functional coupling modes cluster around a core functional architecture. *Philos.*  
955 *Trans. R. Soc. B Biol. Sci.* **369**, 20130526–20130526 (2014).

- 956 38. Bertolero, M. A., Yeo, B. T. T. & D'Esposito, M. The diverse club. *Nat. Commun.*  
957 **8**, 1277 (2017).
- 958 39. van den Heuvel, M. P. & Sporns, O. Rich-Club Organization of the Human  
959 Connectome. *J. Neurosci.* **31**, 15775–15786 (2011).
- 960 40. Bertolero, M. A., Yeo, B. T. T. & D'Esposito, M. The modular and integrative  
961 functional architecture of the human brain. *Proc. Natl. Acad. Sci.* 201510619  
962 (2015). doi:10.1073/pnas.1510619112
- 963 41. Zuo, X.-N. *et al.* Network Centrality in the Human Functional Connectome. *Cereb.*  
964 *Cortex* **22**, 1862–1875 (2012).
- 965 42. Yang, G. R., Song, H. F., Newsome, W. T. & Wang, X.-J. Clustering and  
966 compositionality of task representations in a neural network trained to perform  
967 many cognitive tasks. *bioRxiv* (2017).
- 968 43. Yamins, D. L. K. *et al.* Performance-optimized hierarchical models predict neural  
969 responses in higher visual cortex. *Proc. Natl. Acad. Sci.* **111**, 8619–8624 (2014).
- 970 44. Song, H. F., Yang, G. R. & Wang, X.-J. Training Excitatory-Inhibitory Recurrent  
971 Neural Networks for Cognitive Tasks: A Simple and Flexible Framework. *PLOS*  
972 *Comput. Biol.* **12**, e1004792 (2016).
- 973 45. Van Essen, D. C. *et al.* The WU-Minn Human Connectome Project: an overview.  
974 *Neuroimage* **80**, 62–79 (2013).
- 975 46. Smith, S. M. *et al.* Resting-state fMRI in the Human Connectome Project.  
976 *Neuroimage* **80**, 144–168 (2013).
- 977 47. Barch, D. M. *et al.* Function in the human connectome: task-fMRI and individual  
978 differences in behavior. *Neuroimage* **80**, 169–89 (2013).
- 979 48. Nichols, T. E. & Holmes, A. P. Nonparametric permutation tests for functional  
980 neuroimaging: A primer with examples. *Hum. Brain Mapp.* **15**, 1–25 (2002).
- 981 49. Abbott, L. F., Rajan, K. & Sompolinsky, H. Interactions between Intrinsic and  
982 Stimulus-Evoked Activity in Recurrent Neural Networks. *Dyn. Brain An Explor.*  
983 *Neuronal Var. Its Funct. Significance* 1–16 (2011).  
984 doi:10.1093/acprof:oso/9780195393798.003.0004
- 985 50. Genovese, C. & Wasserman, L. Operating characteristics and extensions of the  
986 false discovery rate procedure. *J. R. Stat. Soc. Ser. B (Statistical Methodol.* **64**,  
987 499–517 (2002).
- 988 51. Norman, K. A., Polyn, S. M., Detre, G. J. & Haxby, J. V. Beyond mind-reading:  
989 multi-voxel pattern analysis of fMRI data. *Trends Cogn. Sci.* **10**, 424–430 (2006).
- 990 52. Glasser, M. F. *et al.* The Human Connectome Project's neuroimaging approach.  
991 *Nat. Neurosci.* **19**, 1175–87 (2016).
- 992
- 993
